# Supplementary material
Source: publisher figshare collection journal article supplement (https://acs.figshare.com/ndownloader/files/6206748)
Supplement: Supplementary file 1 [file 6206748]

## Supporting Information for

# Pure Cs<sub>4</sub>PbBr<sub>6</sub>: Highly Luminescent Zero-Dimensional Perovskite Solids

*Makhsud I. Saidaminov<sup>†</sup>, Jawaher Almutlaq<sup>†</sup>, Smritakshi Sarmah, Ibrahim Dursun, Ayan A. Zhumekenov, Raihana Begum, Jun Pan, Namchul Cho, Omar F. Mohammed\* and Osman M. Bakr\**

Division of Physical Sciences and Engineering, King Abdullah University of Science and Technology (KAUST), Thuwal 23955-6900, Kingdom of Saudi Arabia

### AUTHOR INFORMATION

#### Corresponding Authors

\*[osman.bakr@kaust.edu.sa](mailto:osman.bakr@kaust.edu.sa) and [omar.abdelsaboor@kaust.edu.sa](mailto:omar.abdelsaboor@kaust.edu.sa)

#### Author Contributions

<sup>†</sup>M.I.S. and J.A. contributed equally to this work.

**Synthesis of Cs<sub>4</sub>PbBr<sub>6</sub>.** PbBr<sub>2</sub> (10 mmol) and of CsBr (10 mmol) were dissolved in dimethyl sulfoxide (DMSO, 10 ml) and stirred for one hour. The solution was filtered and heated until 120 °C and kept for 3 h. Then the precipitation was collected with a Buchner funnel, washed with 1 ml DMSO three times, and dried at 100 °C under vacuum overnight. Washing yield is 50% compared to unwashed precipitation.

**The powder X-ray diffraction** was performed on a Bruker AXS D8 diffractometer using Cu-K $\alpha$  radiation.

**The steady-state absorption** was recorded using a Cary 6000i UV-Vis-NIR Spectrophotometer with integrated sphere in diffuse-reflectance mode.

**The steady-state photoluminescence and PLQY** were measured using an Edinburgh Instruments FLS920 Spectrofluorometer, with 465 nm excitation wavelength.

**The temperature-dependent photoluminescence spectra** were characterized using a Horiba JY LabRAM Aramis spectrometer with an Olympus 50x lens in a Linkam THMS600 stage. A 473 nm laser was used as the excitation source.

**Time-resolved photoluminescence measurement** was performed using an Ultrafast Systems HALCYONE femtosecond fluorescence spectrometer.

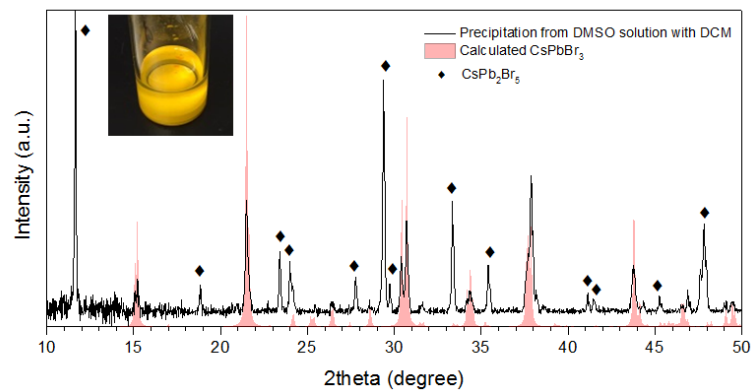

Figure S1. XRD of the powder precipitated from CsBr/PbBr<sub>2</sub> (1/1) - DMSO solution with DCM. It shows that the resultant powder is the mixture of CsPbBr<sub>3</sub> and CsPb<sub>2</sub>Br<sub>5</sub>. Inset: picture of the precipitation.

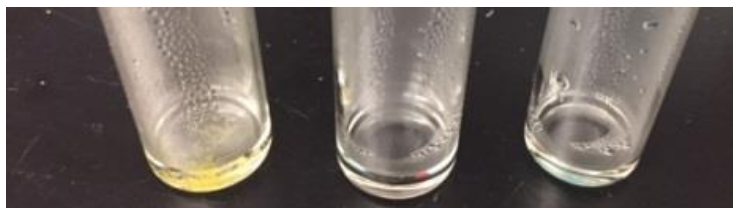

Figure S2. Left to right - filtered solutions of CsBr/PbBr<sub>2</sub> (1/1), (1.25/1) and (1.5/1) in DMSO after keeping at 120 °C for 3 h.

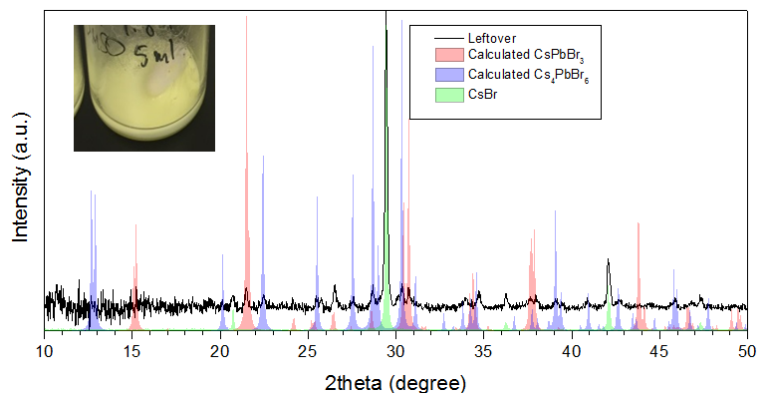

Figure S3. XRD of undissolved powder from CsBr/PbBr<sub>2</sub> (1.5/1) in DMSO. It shows that the leftover powder consists of mainly CsBr, CsPbBr<sub>3</sub> and Cs<sub>4</sub>PbBr<sub>6</sub>. Inset: the picture of undissolved powder.

CsBr does not dissolve completely, and when precipitated, partially reacts with PbBr<sub>2</sub>. This results in decreasing of PbBr<sub>2</sub> concentration. Therefore, the inverse solubility from this solution was not observed.

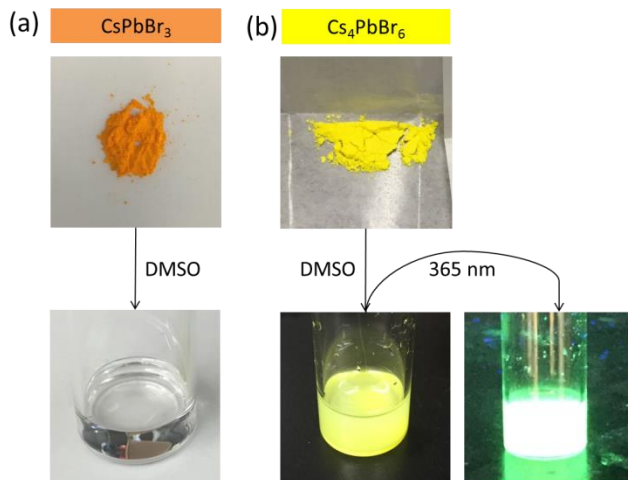

Figure S4. Demonstration of (a) good solubility of CsPbBr<sub>3</sub> and (b) poor solubility of Cs<sub>4</sub>PbBr<sub>6</sub> in DMSO. This observation allowed us to clean the Cs<sub>4</sub>PbBr<sub>6</sub> from CsPbBr<sub>3</sub>.

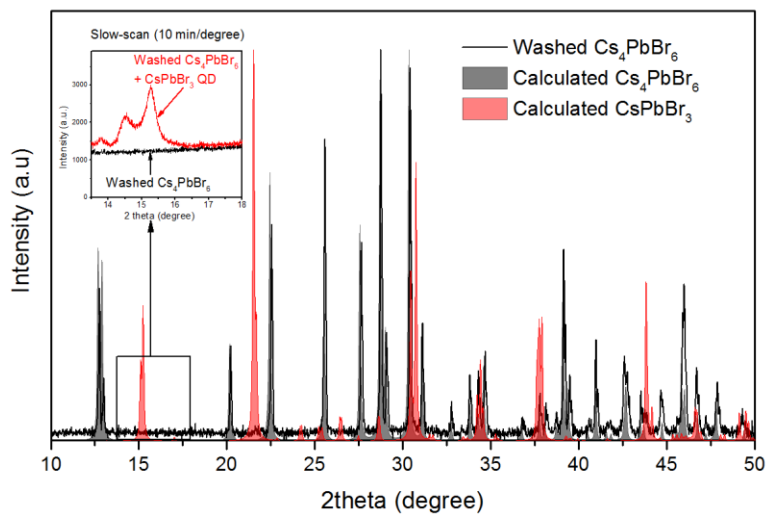

Figure S5. XRD of washed Cs<sub>4</sub>PbBr<sub>6</sub>. Inset: slow scan XRD at 2θ=13.5-18° of washed Cs<sub>4</sub>PbBr<sub>6</sub> in neat and with 2% CsPbBr<sub>3</sub> nanocrystals. This experiment demonstrates that our washed Cs<sub>4</sub>PbBr<sub>6</sub> is pure and free of any presence of CsPbBr<sub>3</sub> in any form, including nanocrystals.

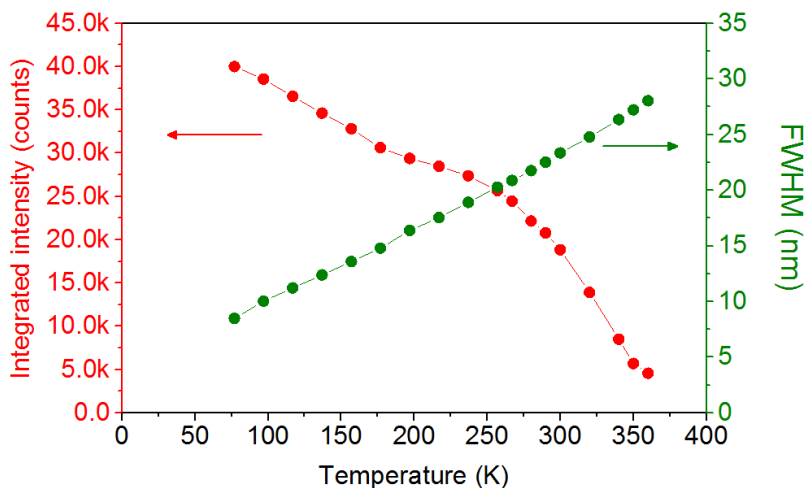

Figure S6. Analysis of temperature-dependent PL. The integrated PL peak at 300 K is 20k, extrapolated at 0K it reaches 45k. Thus, the PLQY at 300 K is 20k/45k = 40%.

FWHM decreases by decreasing the temperature, reaching 10 nm at 77K.

Exciton binding energy was estimated using the following fitting:<sup>[1]</sup>

$$I_T = \frac{I_0}{1 + A \exp\left(-\frac{E_B}{k_B T}\right)}$$

Where  $I_T$  is the integrated intensity at  $T$  K,  $E_B$  is the binding energy, and  $k_B$  is the Boltzmann constant.

## References

- [1] K. Wu, A. Bera, C. Ma, Y. Du, Y. Yang, L. Li, T. Wu, *Phys. Chem. Chem. Phys.* **2014**, *16*, 22476.
